# Supplementary material for: Old World Vipers—A Review about Snake Venom Proteomics of Viperinae and Their Variations
Source: Toxins (Basel). 2021 Jun 17;13(6):427. doi: 10.3390/toxins13060427 (PMC8235416; doi:10.3390/toxins13060427)
Supplement: Supplementary file 1 [file toxins-13-00427-s001.zip › toxins-1255510-SUPP/Supplementary-Tables S1 and S2.xlsx]

## Sheet: SI-Table S1
Table S1	Database of 89 Old World Viper venom proteomes. All proteomes of Viperinae subfamily until 31st December 2020 are alphabetically listed by their current taxonomic status (see Materials and Methods). The original taxon of publications is mentioned. Additionally, details about the used venom pool are listed, like origin, age and sex of the milked snakes, data accessibility of MS results by the stud…
	Genus	11		Atheris				Bitis										Causus			Cerastes							Daboia
	species	37		Atheris chlorechis	Atheris nitschei	Atheris squamigera		Bitis arietans	Bitis arietans	Bitis arietans	Bitis arietans	Bitis caudalis	Bitis gabonica	Bitis gabonica	Bitis nasicornis	Bitis rhinoceros		Causus lichtensteinii	Causus rhombeatus		Cerastes cerastes	Cerastes cerastes	Cerastes cerastes	Cerastes cerastes	Cerastes cerastes	Cerastes vipera		Daboia mauritanica	Daboia mauritanica	Daboia palaestinae	Daboia russelii	Daboia russelii	Daboia russelii	Daboia russelii	Daboia russelii	Daboia russelii	Daboia russelii	Daboia russelii	Daboia russelii	Daboia russelii	Daboia russelii	Daboia russelii	Daboia siamensis	Daboia siamensis	Daboia siamensis	Daboia siamensis	Daboia siamensis	Daboia siamensis	Daboia siamensis
	Species/ Subspecies			Atheris chlorechis	Atheris nitschei	Atheris squamigera		Bitis arietans	Bitis arietans	Bitis arietans	Bitis arietans	Bitis caudalis	Bitis gabonica	Bitis gabonica	Bitis nasicornis	Bitis rhinoceros		Causus lichtensteinii	Causus rhombeatus		Cerastes cerastes	Cerastes cerastes	Cerastes cerastes	Cerastes cerastes	Cerastes cerastes	Cerastes vipera		Daboia mauritanica	Daboia mauritanica	Daboia palaestinae	Daboia russelii	Daboia russelii	Daboia russelii	Daboia russelii	Daboia russelii	Daboia russelii	Daboia russelii	Daboia russelii	Daboia russelii	Daboia russelii	Daboia russelii	Daboia russelii	Daboia siamensis	Daboia siamensis	Daboia siamensis	Daboia siamensis	Daboia siamensis	Daboia siamensis	Daboia siamensis
	published as			Atheris chlorechis	Atheris nitschei	Atheris squamigera		Bitis arietans	Bitis arietans	Bitis arietans	Bitis arietans	Bitis caudalis	Bitis gabonica	Bitis gabonica gabonica	Bitis nasicornis	Bitis gabonica rhinoceros		Causus lichtensteinii	Causus rhombeatus		Cerastes cerastes	Cerastes cerastes	Cerastes cerastes	Cerastes cerastes	Cerastes cerastes	Cerastes vipera		Macrovipera mauritanica	Daboia mauritanica	Vipera xantina palestinae	Daboia russelii	Daboia russelii russelii	Daboia russelii russelii	Daboia russelii	Daboia russelii	Daboia russelii	Daboia russelii	Daboia russelii	Daboia russelii	Daboia russelii	Daboia russelii	Daboia russelii	Vipera russelli siamensis	Vipera russelli formosensis	Daboia russelli siamensis	Daboia russelli siamensis	Daboia siamensis	Daboia siamensis	Daboia siamensis
	1st author position			Wang	Wang	Wang		Juarez	Fasoli	Casewell	Wang	Calvete	Francischetti	Calvete	Calvete	Calvete		Coimbra	Coimbra		Bazaa	Fahmi	Fahmi	Casewell	Ozverel	Bazaa		Makran	Chakir	Momic	Tan	Sharma	Mukherjee	Kalita	Kalita	Kalita	Kalita	Faisal	Pla	Pla	Pla	Pla	Nawarak	Nawarak	Risch	Liu	Sanz	Tan	Tan
	Year of publication			2018	2018	2018		2006	2010	2014	2020	2007	2004	2007	2007	2007		2018	2018		2005	2012	2012	2014	2019	2005		2012	2019	2011	2015	2015	2016	2017	2018	2018	2018	2018	2019	2019	2019	2019	2003	2003	2009	2018	2018	2018	2018
	DOI	54		10.1007/s10930-018-9781-y	10.1007/s10930-018-9781-y	10.1007/s10930-018-9781-y		10.1007/s00239-005-0268-z	10.1016/j.jprot.2009.12.006	10.1073/pnas.1405484111	10.1016/j.jprot.2020.103680	10.1021/pr0701714	10.1016/j.gene.2004.03.024	10.1021/pr060494k	10.1021/pr0701714	10.1021/pr0701714		10.1016/j.cbpc.2018.05.003	10.1016/j.cbpc.2018.05.003		10.1002/pmic.200402024	10.1016/j.jprot.2012.02.021	10.1016/j.jprot.2012.02.021	10.1073/pnas.1405484111	10.1016/j.cbpc.2019.02.013	10.1002/pmic.200402024		10.1016/j.jprot.2012.02.022	no DOI	10.3390/toxins3111420	10.1016/j.jprot.2015.08.017	10.1016/j.toxicon.2015.06.027	10.1016/j.jprot.2016.06.001	10.1021/acs.jproteome.6b00693	10.1021/acs.jproteome.8b00291	10.1021/acs.jproteome.8b00291	10.1016/j.ijbiomac.2018.06.083	10.1016/j.jprot.2018.05.003	10.1016/j.jprot.2019.103443	10.1016/j.jprot.2019.103443	10.1016/j.jprot.2019.103443	10.1016/j.jprot.2019.103443	10.1002/elps.200305552	10.1002/elps.200305552	10.1016/j.jprot.2009.01.006	10.1016/j.jprot.2018.06.003	10.3390/tropicalmed3020066	10.1038/s41598-018-25955-y	10.1038/s41598-018-25955-y
	PMID	54		30014259	30014259	30014259		16786436	20026262	24927555	32028038	17559253	15276202	17203976	17559253	17559253		29758383	29758383		16206329	22387316	22387316	24927555	30825636	16206329		22387317	no PMID	22174978	26342672	26160495	27265321	27936776	29938511	29938511	29924981	29729992	31325606	31325606	31325606	31325606	12929180	12929180	19457351	29929037	30274462	29867131	29867131
Meta Data	Pool size			unknown	unknown	unknown		15	unknown	10	unknown	unknown	1	unknown	unknown	unknown		>1	>1		unknown	unknown	unknown	10	1	unknown		unknown	10	unknown	>5	>1	3	4	4	4	unknown	>10	30	unknown	unknown	unknown	unknown	unknown	unknown	unknown	>1	unknown	>10
	# male			-	-	-		yes	-	yes	-	-	-	-	-	-		-	-		yes	-		yes	-	yes		-	-	-	-	-	-	-	-	-	-	-	-	-	-	-	-	-	yes	-	-	-	-
	# female			-	-	-		yes	-	yes	-	-	-	-	-	-		-	-		yes	-		yes	-	yes		-	-	-	-	-	-	-	-	-	-	-	-	-	-	-	-	-	yes	-	-	-	-
	# sex unknown			all	all	all		-	all	-	all	all	all	all	all	all		all	all		-	all	all	-	all	-		all	all	all	all	all	all	all	all	all	-	all	all	all	all	all	all	all	-	all	all	all	all
	age			unknown	unknown	unknown		unknown	unknown	divers	unknown	unknown	unknown	unknown	unknown	unknown		adult	adult		unknown	adult	adult	divers	adult	unknown		adult	adult	unknown	unknown	unknown	unknown	adult	adult	adult	unknown	adult	unknown	unknown	unknown	unknown	unknown	unknown	unknown	unknown	adult	unknown	unknown
	origin of snakes			captivity	captivity	captivity		captivity	captivity	unknown	captivity	captivity	captivity	captivity	captivity	unknown		captivity	captivity		captivity	captivity	captivity	unknown	captivity	captivity		unknown	unknown	captivity	captivity	wild	captivity	captivity	unknown	unknown	unknown	wild	wild	captivity	unknown	unknown	captivity	unknown	captivity	wild	captivity	unknown	wild
Origin	Country			unknown	unknown	unknown		Ghana	West Africa	Nigeria	unknown	unknown	unknown	unknown	unknown	unknown		unknown	unknown		Tunisia	Tunisia	Morocco	Egypt	Egypt	Tunisia		Morocco	Morocco	Israel	Sri Lanka	India (S)	Pakistan	India (W)	India (E)	India (E)	India (S)	Pakistan	Sri Lanka	Pakistan	Bangladesh	India (S)	unknown	unknown	Myanmar	Taiwan	Taiwan	Taiwan	China
	Region			unknown	unknown	unknown		unknown	unknown	unknown	unknown	unknown	unknown	unknown	unknown	unknown		unknown	unknown		unknown	unknown	unknown	unknown	unknown	unknown		unknown	Guelmim	unknown	Anuradhapura, Ratnapura, Galle, Colombo regions	small region of Tamil Nadu	unknown	Mumbai	Burdwan, West Bengal	Nadia, West Bengal	Irula	Indus Delta	unknown	unknown	unknown	Tamil Nadu	unknown	unknown	unknown	unknown	unknown - various geographic regions	unknown	Guangxi
	Place of captivity			Latoxan (Rosans, France)	Latoxan (Rosans, France)	Latoxan (Rosans, France)		Herpetarium of the Liverpool School of Tropical Medicine	Latoxan	Herpetarium of the Liverpool School of Tropical Medicine	Venom Supplies Pty. Ltd. (Tanunda, Australia)	Latoxan (Valence, France)	Kentucky Reptile Zoo (Slade, KY)	Latoxan Serpentarium (Rosans, France)	Latoxan (Valence, France)	unknown		MToxins	Miami Serpentarium Laboratories (Punta Gorda, Florida, USA)		Serpentarium of the Institute Pasteur de Tunis	Institut Pasteur de Tunis (Tunis, Tunisia)	serpentarium of the Institut Pasteur du Maroc (Casablanca, Morocco)	Herpetarium of the Liverpool School of Tropical Medicine	unknown	Serpentarium of the Institute Pasteur de Tunis		serpentarium of the Institut Pasteur du Maroc	Institut Pasteur of Morocco at Tit Mellil	Serpentarium	Serpentarium at the University of Colombo (Sri Lanka)	-	Kentucky Reptile Zoo (Slade, KY)	Haffkine Institute (Mumbai, India)	-	-	Premium Serum and Vaccines Pvt. Ltd. (Pune)	-	Serpentarium in Sri Lanka	Latoxan SAS (Portes lès Valence, France)	unknown	-	Queen Saovabha Memorial Institute, Thai Red Cross Society, Bangkok, Thailand	unknown	unknown	-	CDC (Taipei, Taiwan)	unknown	-
Data access	Online database			-	-	-		-	-	-	ProteomeXchange Consortium	-	-	-	-	-		-	-		-	-	-	-	ProteomeXchange Consortium	-		-	-	-	-	-	-	-	ProteomeXchange Consortium	ProteomeXchange Consortium	-	-	-	-	-	-	-	-	-	-	-	-	-
	Used tool			-	-	-		-	-	-	PRIDE	-	-	-	-	-		-	-		-	-	-	-	MassIVE	-		-	-	-	-	-	-	-	PRIDE	PRIDE	-	-	-	-	-	-	-	-	-	-	-	-	-
	Database ID			-	-	-		-	-	-	PXD016503	-	-	-	-	-		-	-		-	-	-	-	PXD010706	-		-	-	-	-	-	-	-	PXD008607	PXD008607	-	-	-	-	-	-	-	-	-	-	-	-	-
Analysis	BU - VX	42						1		1		1		1	1	1					1	1	1	1	1	1		1		1									1	1	1	1					1
	BU - 1DE	10		1	1	1												1	1												1						1	1								1
	BU - 2DPAGE	16							1									1	1																								1	1	1		1
	BU - Shotgun (including whole venom SG and seperation by Gelfiltatrationanf fraction SG or SEC fractions, so 1D separation)	26																											1		1	1	1	1	GF+1DE	GF+1DE		1								1		1	1
	BU - GF	3
	BU - GF + 1D SDS PAGE	3		1	1	1
	TD	9																							1
	TD - ISD	1
	IMP - MS	18									1										1				1	1			1					1			1
	IMP - SDS Gel	5
	N-terminal sequencing	31		-	-	-		1	1	1	-	1	1	1	1	1		-	-		1	1	1	1	-	1		1	1	1		-	-	-	-	-	-	-	-	-	-	-	1	1	-	-	-	-	-
						.
Quantification		89
x	Q - Snake venomics	42						1		1		1		1	1	1					1	1	1	1	1	1		1		1									1	1	1	1					1
a	Q - GF/EI + MS	5																															1	1	1	1
b	Q - 1D Densio + MS	3																													1						1
c	Q - RP-HPLC + MS	3																																				1
d	Q - 2D Densio	2
e	Q - emPAI	1									1
f	Q - MS	8																																														1	1
g	Q - MaxLFQ	4
n	No Quantification	21		1	1	1			1				1					1	1										1			1											1	1	1	1
	Q - Method			n	n	n		x	n	x	e	x	n	x	x	x		n	n		x	x	x	x	x	x		x	n	x	b	n	a	a	a	a	b	c	x	x	x	x	n	n	n	n	x	f	f
	1. Q step			-	-	-		C18 (215 nm)	-	C18 (215 nm)	MS	C18 (215 nm)	-	C18 (215 nm)	C18 (215 nm)	C18 (215 nm)		-	-		C18 (215 nm)	C18 (215 nm)	C18 (215 nm)	C18 (215 nm)	C18 (215 nm)	C18 (215 nm)		C18 (215 nm)	-	C18 (? nm)	1D PAGE Densio	-	GF (280 nm)	IE (280 nm)	GF (280 nm)	GF (280 nm)	1D PAGE Densio	C18 (215 nm)	C18 (215 nm)	C18 (215 nm)	C18 (215 nm)	C18 (215 nm)	-	-	-	-	C18 (215 nm)	MS	MS
	2. Q step			-	-	-		1D PAGE Densio	-	1D PAGE Densio	-	1D PAGE Densio	-	1D PAGE Densio	1D PAGE Densio	1D PAGE Densio		-	-		1D PAGE Densio	1D PAGE Densio	1D PAGE Densio	1D PAGE Densio	1D PAGE Densio	1D PAGE Densio		1D PAGE Densio	-	1D PAGE Densio	MS	-	MS	MS	MS	MS	avg. MS	MS	1D PAGE Densio	1D PAGE Densio	1D PAGE Densio	1D PAGE Densio	-	-	-	-	1D PAGE Densio	-	-
	3. Q step			-	-	-		-	-	MS	-	MS	-	MS	MS	MS		-	-		-	MS	MS	MS	MS	-		MS	-	-	-	-	-	-	-	-	-	-	MS	MS	MS	MS	-	-	-	-	MS	-	-
	MSQ			-	-	-		-	-	TOP3 SpI	emPAI	TOP3 SpI	-	TOP3 SpI	TOP3 SpI	TOP3 SpI		-	-		-	TOP3 SpI	TOP3 SpI	TOP3 SpI	TOP3 SpI	-		TOP3 SpI	-	-	SpI/X	-	SpC/X	SpI/N	SpC/N	SpC/N	SpI/N + SpC/L	SpI/X	TOP3 SpI	TOP3 SpI	TOP3 SpI	TOP3 SpI	-	-	-	-	TOP3 SpI	SpI/X	SpI/X
Toxin families
Majors	svMP	snake venom metalloproteinase		yes	yes	yes		38.5	yes	24.6	1.7744	11.5	yes	23.4	41	31.4		yes	yes		37	55.9	63.1	35	28.1782	48		46.5	yes	65	6.9	yes	21.8	24.8	19.79	17.71	4.63	2.5	4.8	4.8	13.1	3.4	yes	yes	yes	yes	9.2	5.86	8.92
	PLA2	phospholipase A2		yes	yes	yes		4.3	yes	5.3	0	59.8	yes	11.4	20.1	4.8		0	yes		20	16.6	19.1	17.6	16.0142	21		5.5	yes	4	34.9	yes	32.8	32.5	22.19	21.5	43.25	63.81	60.1	50.4	47.5	70.6	yes	yes	yes	yes	47.5	24.48	22.19
	svSP	snake venom serine protease		0	yes	yes		19.5	yes	23.9	6.14702	15.1	yes	26.4	21.9	23.9		yes	yes		9	13.2	6.9	18.8	24.8663	20		8.3	yes	9	16	yes	3.2	8	13.89	14.3	12.86	5.5	12.8	9.1	14.2	8.5	0	0	yes	yes	19.1	17.51	13.61
	CTL	C-type lectin-related protein incl. Snaclec		0	0	0		13.2	yes	34.2	17.4271	4.9	yes	14.3	4.2	14.1		0	0		24	3.2	1.7	9.1	9.09702	1		8.1	yes	10	22.4	yes	6.4	1.8	11.1	12.05	14.57	1.3	4.3	4.4	6.8	3.9	0	0	yes	yes	5.2	16.52	16.89
	DI	disintegrin		yes	yes	yes		17.8	yes	3.4	26.1724	2.3	yes	3.4	3.5	8.5		0	0		8	4.9	8.5	7.4	9.68687	1		13.8	yes	8	0	yes	0.4	4.9	2.2	1.38	0	0	0	0	0.8	0	0	0	0	0	1.2	0	0
Secondaries	LAAO	L-amino acid oxidase		0	0	0		0	yes	4.6	5.95691	1.7	yes	1.3	3.2	2.2		yes	yes		12	6.2	0	0.9	0	9		0	0	0	5.2	yes	0.6	0.3	1.67	1.5	7.52	0.8	3.9	3.3	2.5	2.7	0	0	yes	0	0	0	5.95
	CRISP	cysteine-rich secretory protein		0	0	0		0	0	0	7.28771	1.2	0	2	1.3	1.2		yes	yes		0	0	0.7	1.7	0	0		0	0	0	2	yes	2.6	6.8	3.88	3.08	4.94	1.3	3.3	2.3	2.9	2.1	0	0	0	0	0.1	0	0.95
	VEGF	vascular endothelial growth factors F		0	0	0		0	0	0	9.31559	0	0	1	0	0		0	0		0	0	0	0	0	0		10.8	yes	2	yes	yes	1.5	1.8	1.11	3.45	3.68	4.3	1.8	2.7	1.9	1.9	0	0	yes	yes	7.2	4.84	4.79
	KUN	Kunitz‐type inhibitor		0	0	0		4.1	yes	0	0	3.2	yes	3	0	7.5		0	0		0	0	0	0	0	0		2.5	yes	0	4.6	yes	28.4	12.5	20.29	22.9	1.67	16	2.75	17.8	7.9	2.4	0	0	0	yes	9.4	28.21	23.17
Minors	Minors w/o CYS			0	0	0		0	yes	2	4.37262	0	0	0	0	0		0	0		0	0	0	0	0	0		0	0	2	7.9	yes	1.8	6.7	3.35	1.84	5.85	3.7	0.08	1.72	2.2	0.73	0	0	0	yes	1.2	2.44	3.18
	CYS	cystatin		0	0	0		1.7	yes	1.2	6.52725	0	yes	9.8	4.2	5.3		0	0		0	0	0	0	0	0		0	0	0	0	0	0	0	0	0	0	0	0	0	0	0	0	0	0	0	0	0	0
Rare	Rare			0	0	0		0	0	yes	15.019	0	0	0	0	0		0	0		0	0	0	0	0	0		0	0	0	0	0	0.2	0	0.53	0.38	1.03	0	0.04	0.01	0.07	0.05	yes	yes	0	yes	0	0.15	0.35
Peptides	svMP-i	svMP-inhibitor		0	0	0		0	0	1.2	0	0	0	0	0	0		0	0		0	0	0	yes	8.83237	0		0	0	0	0	0	0	0	0	0	0	0	2.9	0	0	3.5	0	0	0	0	0	0	0
	BBP/NPetc	bradykinin potentiating peptide and natriuretic peptides		0	0	0		0	0	0.9	0	0	0	2.8	0	0.3		0	0		0	0	0	0	0	0		4.5	0	0	0	0	0	0	0	0	0	0	0	0	0	0	0	0	0	0	0	0	0
	other peptides			yes	yes	yes		0	0	1.3	0	0.3	0	1.2	0.7	0.8		0	0		0	0	0	9.5	1.04075	0		0	0	0	0	0	0	yes	0	0	0	0	0	0	0	0	0	0	0	0	0	0	0
Unknown	Unknown			yes	yes	yes		0.9	yes	0.8	0	0	0	0	0	0		0	0		0	0	0	0	2.28427	0		0	0	0	0	yes	0.2	0	0	0	0	0.7	0	0	0.1	0	0	0	0	0	0	0	0
svMP	svMP	snake venom metalloproteinase		yes	yes	yes		38.5	yes	24.6	1.7744	11.5		22.9	40.9	30.8		yes	yes		37			35	28.1782	48			yes	65	6.9	yes	21.8	24.8	19.79	17.71	4.63	2.5		4.8		3.4	yes	yes	yes	yes	9.2	5.86	8.92
	svMP-PI																					55.9	5.8					7.1
	svMP-PII
	svMP-PIII																						57.3					34													10.4
	DC-domain/fragments													0.5	0.1	0.6												1.1													0.5
	svMP-PIV																											4.3											4.8		2.2
PLA2	PLA2	phospholipase A2		yes	yes	yes		4.3	yes	5.3		59.8	yes	11.4	20.1	4.8			yes		20	16.6	19.1	17.6	16.0142	21					19.5	yes	32.8	32.5	22.19	21.5	43.25						yes	yes		yes			0.96
	PLA2-S49																											5.5																			47.5
	PLA2-D49																																						60.1	50.4	47.5	70.6
	basic PLA																														15.1							42.3							yes			13.61	7.43
	neutral PLA
	acidic PLA																												yes		0.3							21.51							yes			10.87	13.8
	neurotoxic PLA2																													2
	myotoxic PLA2																													2
svSP	svSP	snake venom serine protease			yes	yes		19.5	yes	23.9	6.14702	15.1	yes	26.4	21.9	23.9					9	13.2	6.9	18.8	24.8663	20		8.3	yes	9	16	yes	3.2	8	13.89	14.3	12.86	5.5	12.8	9.1	14.2	8.5			yes	yes	19.1	17.51	13.61
	kallikrein SP																	yes	yes
	TLE	thrombin-like enzyme																											yes					yes
CTL	CTL /CLRP/snaclec	C-type lectin-related protein incl. Snaclec						13.2	yes	34.2	17.4271	4.9	yes	14.3	4.2	14.1					24	3.2	1.7	9.1	9.09702	1		8.1	yes	10	22.4	yes	6.4	1.8	11.1	12.05	14.57	1.3	4.3	4.4	6.8	3.9			yes	yes	5.2	16.52	16.89
DI	Dis	disintegrin		yes	yes	yes			yes	3.4	26.1724		yes									4.9	8.5	7.4	9.68687				yes			yes	0.4	4.9	2.2	1.38											1.2
	Dis-Short																											7.8	yes	1
	Dis-medium
	Dis-Long							17.8
	Dis-Dim				yes							2.3		3.4	3.5	8.5					8					1		6		6
	Dis-Cys rich																													1
	RTS-Dis																																								0.8
LAAO	LAAO	L-amino acid oxidase							yes	4.6	5.95691	1.7	yes	1.3	3.2	2.2		yes	yes		12	6.2		0.9		9					5.2	yes	0.6	0.3	1.67	1.5	7.52	0.8	3.9	3.3	2.5	2.7			yes				5.95
CRISP	CRISP	cysteine-rich secretory protein									7.28771	1.2		2	1.3	1.2		yes	yes				0.7	1.7							2	yes	2.6	6.8	3.88	3.08	4.94	1.3	3.3	2.3	2.9	2.1					0.1		0.95
VEGF	VEGF	vascular endothelial growth factors F									9.31559			1														4.9	yes	2	yes	yes	1.5	1.8	1.11	3.45	3.68	4.3	1.8	2.7	1.9	1.9			yes	yes	7.2	4.84	4.79
	VEGF - fragments																											5.9
KUN	KTZ/KUN	Kunitz‐type inhibitor						4.1	yes			3.2	yes	3		7.5												2.5	yes		4.6	yes	28.4	12.5	20.29	22.9	1.67	16	2.75	17.8	7.9	2.4				yes	9.4	28.21	23.17
Minors	NGF	nerve growth factor																												2	3.5	yes	0.4	4.8	1.55	0.73	1.64	1.1	0.05	0.3	0.5	0.02				yes	0.3	2.13	2.11
	5N	5'-nucleotidase							yes	2	3.5488																				3	yes	0.6	0.4	0.96	0.5	1.81	0.1	0.02	0.92	0.8	0.2				yes			0.82
	PDE	phosphodiesterase									0.190114																				1.3	yes	0.6	1.4	0.74	0.5	1.43	2.5	0.01	0.5	0.9	0.5				yes	0.9	0.31	0.25
	HYAL	hyaluronidase																															0.2		0.1	0.05						0.01
	PLB	phospholipase B									0.633714																				0.1			0.1		0.06	0.97									yes
CYS	CYS	cystatin						1.7	yes	1.2	6.52725		yes	9.8	4.2	5.3
Rare	glutaminyl cylcase																																0.2		0.07	0.38	0.99		0.04	0.01	0.03	0.05				yes
	Glutathione (GSH) peroxidase
	glycosyl hydrolase																																													yes
	PLA2 inhibitor
	AminoPeptidase									yes																									0.46						0.04			yes				0.15	0.35
	Aspartic Protease
	RLAP	renin-like aspartic protease
	carboxypeptidase																																				0.04
	Cysteine proteases
	other peptidases																																										yes	yes
	Other proteins
	blood protein
	3FTx	three finger toxin									15.019
Peptides	svMP-i	svMP-inhibitor								1.2														yes	8.83237														2.9			3.5
	BPP/pGpH/natriu NP	bradykinin potentiating peptide and natriuretic peptides								0.9				2.8		0.3												4.5
	other Peptides			yes	yes	yes				1.3		0.3		1.2	0.7	0.8								9.5	1.04075									yes
	Angiotensin like peptide
NA	not annotated			yes	yes	yes		0.9	yes	0.8															2.28427							yes	0.2					0.7			0.1
	no quantification			100	100	100			100				100					100	100										100			100											100	100	100	100
[truncated: 47 more columns]

## Sheet: SI-Table S2
Table S2	List of all searched taxa for the detailed literature search.
	Genus	Species	Subspecies	synonym	Note
	Atheris	Atheris acuminata
		Atheris anisolepis
		Atheris barbouri		Adenorhinos barbouri
		Atheris broadleyi
		Atheris ceratophora
		Atheris chlorechis
		Atheris desaixi
		Atheris hetfieldi
		Atheris hirsuta
		Atheris hispida
		Atheris katangensis
		Atheris mabuensis
		Atheris matildae
		Atheris mongoensis
		Atheris nitschei
		Atheris rungweensis
		Atheris squamigera
		Atheris subocularis
	Bitis	Bitis albanica
		Bitis arietans		Bitis arientans
				Bitis arietans somalica
				Bitis lachesis somalica
		Bitis armata
		Bitis atropos
		Bitis caudalis
		Bitis cornuta
		Bitis gabonica
		Bitis harenna
		Bitis heraldica
		Bitis inornata
		Bitis nasicornis
		Bitis parviocula
		Bitis peringueyi
		Bitis rhinoceros
		Bitis rubida
		Bitis schneideri
		Bitis worthingtoni
		Bitis xeropaga
	Bitis (Keniabitis)				Bitis subgenus
	Bitis (Bitis)				Bitis subgenus
	Bitis (Macrocerastes)				Bitis subgenus
	Bitis (Calechidna)				Bitis subgenus
	Causus	Causus bilineatus
		Causus defilippii
		Causus lichtensteinii
		Causus maculatus
		Causus rasmusseni
		Causus resimus
		Causus rhombeatus
	Cerastes	Cerastes boehmei
		Cerastes cerastes
		Cerastes gasperettii		Cerastes gasperetti
				Cerastes cerastes gasperettii
		Cerastes vipera
	Daboia	Daboia mauritanica		Macrovipera mauritanica
				Vipera mauritanica
				Daboia deserti
				Macrovipera deserti
				Vipera deserti
		Daboia palaestinae		Vipera palaestinae
				Vipera palestinae
				Vipera xanthina palestine
				Vipera xantina palestinae
		Daboia russelii		Daboia russelli
				Daboia russellii russelii
				Vipera russelii
		Daboia siamensis		Daboia russelli siamensis
				Daboia russelii siamensis
				Vipera siamensis
				Vipera russelli siamensis
				Vipera russelli formosensis
				Vipera russelli limitis
	Echis	Echis borkini
		Echis carinatus	Echis carinatus carinatus
			Echis carinatus sochureki
		Echis coloratus	Echis coloratus coloratus
			Echis coloratus terraesanctae
		Echis hughesi
		Echis jogeri
		Echis khosatzkii
		Echis leucogaster
		Echis megalocephalus
		Echis ocellatus
		Echis omanensis
		Echis pyramidum	Echis pyramidum pyramidum
			Echis pyramidum leakeyi
		Echis romani
	Eristicophis	Eristicophis macmahoni		Eristicophis macmahonii
	Macrovipera	Macrovipera lebetina	Macrovipera lebetina cernovi	Macrovipera lebetina
			Macrovipera lebetina obtusa	Daboia lebetina
			Macrovipera lebetina transmediterranea	Macrovipera lebetinus
			Macrovipera lebetina turanica
		Macrovipera razii
		Macrovipera schweizeri
	Montatheris	Montatheris hindii
	Montivipera	Montivipera albizona		Montivipera bulgardaghica albizona
		Montivipera bornmuelleri
		Montivipera bulgardaghica		Vipera bulgardaghica
		Montivipera kuhrangica
		Montivipera latifii		Vipera latifii
		Montivipera raddei		Vipera raddei
				Montivipera albicornuta
				Montivipera raddei kurdistanica
				Vipera kurdistanica
				Vipera ursinii renardi
		Montivipera wagneri		Vipera wagneri
		Montivipera xanthina		Daboia xanthina
				Vipera xanthina
	Proatheris	Proatheris superciliaris		Atheris superciliaris
				Bitis superciliaris
	Pseudocerastes	Pseudocerastes fieldi
		Pseudocerastes persicus
		Pseudocerastes urarachnoides
	Vipera	Vipera altaica		Pelias altaica
		Vipera ammodytes	Vipera ammodytes ammodytes
			Vipera ammodytes meridionalis
			Vipera ammodytes montandoni
		Vipera anatolica	Vipera anatolica anatolica	Pelias anatolica
			Vipera anatolica senliki
		Vipera aspis	Vipera aspis aspis
			Vipera aspis atra
			Vipera aspis francisciredi
			Vipera aspis hugyi
			Vipera aspis zinnikeri
		Vipera berus	Vipera berus barani	Pelias barani
				Vipera barani
			Vipera berus berus	Pelis berus
			Vipera berus bosniensis
			Vipera berus nikolskii
			Vipera berus sachalinensis
		Vipera darevskii		Pelias darevksii
				Vipera olguni
				Pelias olguni
		Vipera dinniki		Pelias dinniki
		Vipera eriwanensis		Pelias eriwanensis
				Vipera shemakhensis
				Pelias shemakhensis
		Vipera graeca		Vipera ursinii graeca
		Vipera kaznakovi		Pelias kaznakovi
				Vipera magnifica
				Pelias magnifica
				Vipera pontica
				Pelias pontica
		Vipera latastei
		Vipera lotievi		Pelias lotievi
		Vipera monticola
		Vipera nikolskii
		Vipera orlovi		Pelias orlovi
		Vipera renardi
		Vipera sakoi
		Vipera seoanei
		Vipera transcaucasiana		Vipera ammodytes transcaucasiana
		Vipera ursinii		Pelias ursinii
		Vipera walser
	Vipera (Pelias)				Vipera subgenus
